# Supplementary material for: Mitogenomics, Phylogeny and Morphology Reveal Ophiocordyceps pingbianensis Sp. Nov., an Entomopathogenic Fungus from China
Source: MDPI journal article supplement (doi:10.3390/life11070686), 2021-07-14
Supplement: s1 [file s1]

**Table S2.** Specimen information and GenBank accession numbers for mitogenomes used in this study.

| Family               | Species                             | Voucher<br>Information | Genbank<br>Accession Number | Mitogenome<br>Length (bp) |
|----------------------|-------------------------------------|------------------------|-----------------------------|---------------------------|
| Bionectriaceae       | <i>Acremonium chrysogenum</i>       |                        | KF757229                    | 27266                     |
|                      | <i>Acremonium fuci</i>              | 3a34                   | KR864757                    | 24565                     |
|                      | <i>Acremonium implicatum</i>        |                        | KP164992                    | 22376                     |
|                      | <i>Clonostachys rosea</i>           | 6792                   | KU668563                    | 40921                     |
| Clavicipitaceae      | <i>Akanthomyces lecanii</i>         | RCEF 1005              | MN904747                    | 24643                     |
|                      | <i>Epichloe festucae</i>            | AR5                    | KX066186                    | 88744                     |
|                      | <i>Epichloe typhina</i>             | E8                     | KX066185                    | 84630                     |
|                      | <i>Metacordyceps chlamydosporia</i> | 170                    | KF479445                    | 25615                     |
|                      | <i>Metarhizium anisopliae</i>       | ME1                    | AY884128                    | 24673                     |
|                      | <i>Metarhizium robertsii</i>        | ARSEF 2575             | JELW01000367                | 24944                     |
| Cordycipitaceae      | <i>Beauveria bassiana</i>           | e17                    | KT201149                    | 29944                     |
|                      | <i>Beauveria caledonica</i>         | fhr1                   | KT201150                    | 38316                     |
|                      | <i>Beauveria malawiensis</i>        | k89                    | KT201147                    | 44135                     |
|                      | <i>Beauveria pseudobassiana</i>     | C1010                  | KF297618                    | 28006                     |
|                      | <i>Cordyceps bassiana</i>           |                        | EU100742                    | 32263                     |
|                      | <i>Cordyceps brongniartii</i>       | IMBST95031             | EU100743                    | 33926                     |
|                      | <i>Cordyceps cicadae</i>            | CCAD02                 | MH922223                    | 56581                     |
|                      | <i>Cordyceps militaris</i>          | F02                    | KP722505                    | 31854                     |
|                      | <i>Cordyceps tenuipes</i>           | YFCC 2017002           | MK234910                    | 31386                     |
|                      | <i>Lecanicillium muscarium</i>      |                        | AF487277                    | 24499                     |
|                      | <i>Lecanicillium saksenae</i>       |                        | KT585676                    | 25919                     |
|                      | <i>Paecilomyces hepiali</i>         |                        | KJ764671                    | 24245                     |
|                      | <i>Parengyodontium album</i>        | ATCC 56482             | KX061492                    | 28081                     |
| Hypocreaceae         | <i>Hypomyces aurantius</i>          |                        | KU666552                    | 71638                     |
|                      | <i>Paecilomyces penicillatus</i>    | SAAS_ppe1              | MK069583                    | 27480                     |
|                      | <i>Trichoderma asperellum</i>       | B05                    | KR952346                    | 29999                     |
|                      | <i>Trichoderma gamsii</i>           | KUC1747                | KU687109                    | 29303                     |
|                      | <i>Trichoderma hamatum</i>          |                        | MF287973                    | 32763                     |
|                      | <i>Trichoderma reesei</i>           |                        | AF447590                    | 42130                     |
| Lasiosphaeriaceae    | <i>Podospora anserina</i>           |                        | X55026                      | 100314                    |
| Nectriaceae          | <i>Fusarium circinatum</i>          |                        | JX910419                    | 67109                     |
|                      | <i>Fusarium commune</i>             | JCM11502               | LT906348                    | 47526                     |
|                      | <i>Fusarium culmorum</i>            | CBS 139512             | KP827647                    | 103844                    |
|                      | <i>Fusarium fujikuroi</i>           |                        | JX910420                    | 46761                     |
|                      | <i>Fusarium gerlachii</i>           | CBS 123666             | KM486533                    | 93428                     |
|                      | <i>Fusarium graminearum</i>         |                        | DQ364632                    | 95676                     |
|                      | <i>Fusarium mangiferae</i>          |                        | KP742838                    | 30629                     |
|                      | <i>Fusarium oxysporum</i>           | mh2-2                  | MF155191                    | 46026                     |
|                      | <i>Fusarium proliferatum</i>        | ITEM2400               | LT841261                    | 46549                     |
|                      | <i>Fusarium solani</i>              |                        | JN041209                    | 62978                     |
|                      | <i>Gibberella moniliformis</i>      |                        | JN041210                    | 53753                     |
|                      | <i>Ilyonectria destructans</i>      | 2007/P/476             | KU881725                    | 42895                     |
|                      | <i>Nectria cinnabarina</i>          | 5175                   | KT731105                    | 69895                     |
| Ophiocordycipitaceae | <i>Hirsutella minnesotensis</i>     | 3608                   | KR139916                    | 52245                     |
|                      | <i>Hirsutella rhossiliensis</i>     | USA-87-5               | KU203675                    | 62483                     |
|                      | <i>Hirsutella thompsonii</i>        | ARSEF 1947             | MH367296                    | 65332                     |
|                      | <i>Hirsutella vermicola</i>         | AS3.7877               | KY465721                    | 53793                     |

|              |                                      |           |          |        |
|--------------|--------------------------------------|-----------|----------|--------|
|              | <i>Ophiocordyceps pingbianensis</i>  | YFCC 8075 | MW042690 | 80359  |
|              | <i>Ophiocordyceps sinensis</i>       |           | KY622006 | 157539 |
|              | <i>Tolypocladium inflatum</i>        | ARSEF 616 | KY924883 | 24973  |
|              | <i>Tolypocladium ophioglossoides</i> | L2        | KX455872 | 35159  |
|              | <i>Tolypocladium cylindrosporum</i>  | ARSEF963  | MN842262 | 34698  |
| Sordariaceae | <i>Neurospora crassa</i>             |           | KY498478 | 64848  |
