# Supplementary material for: Mitogenomics, Phylogeny and Morphology Reveal Ophiocordyceps pingbianensis Sp. Nov., an Entomopathogenic Fungus from China
Source: MDPI journal article supplement (doi:10.3390/life11070686), 2021-07-14
Supplement: s1 [file s1]

**Table S6.** tRNAs in the mitogenome from *Ophiocordyceps pingbianensis*.

| tRNA Type | Anticodon | Numbers |
|-----------|-----------|---------|
| His       | GTG       | 1       |
| Met       | CAT       | 3       |
| Arg       | ACG       | 1       |
| Cys       | GCA       | 1       |
| Arg       | TCT       | 1       |
| Tyr       | GTA       | 1       |
| Asp       | GTC       | 1       |
| Ser       | GCT       | 1       |
| Asn       | GTT       | 1       |
| Gly       | TCC       | 1       |
| Val       | TAC       | 1       |
| Ile       | GAT       | 1       |
| Ser       | TGA       | 1       |
| Trp       | TCA       | 1       |
| Pro       | TGG       | 1       |
| Thr       | TGT       | 1       |
| Glu       | TTC       | 1       |
| Leu       | TAA       | 1       |
| Phe       | GAA       | 1       |
| Lys       | TTT       | 1       |
| Ala       | TGC       | 1       |
| Leu       | TAG       | 1       |
| Gln       | TTG       | 1       |
