# Supplementary material for: Mitogenomics, Phylogeny and Morphology Reveal Ophiocordyceps pingbianensis Sp. Nov., an Entomopathogenic Fungus from China
Source: MDPI journal article supplement (doi:10.3390/life11070686), 2021-07-14
Supplement: s1 [file s1]

**Table S1.** Specimen information and GenBank accession numbers for sequences used in this study.

| Taxon                                         | Voucher Information | Genbank Accession Number |              |               |              |              |
|-----------------------------------------------|---------------------|--------------------------|--------------|---------------|--------------|--------------|
|                                               |                     | <i>nrSSU</i>             | <i>nrLSU</i> | <i>tef1-α</i> | <i>rpb1</i>  | <i>rpb2</i>  |
| <i>Ophiocordyceps pseudocommunis</i>          | NHJ 12581           | EF468973                 | EF468831     | EF468775      |              | EF468930     |
| <i>Hirsutella cryptosclerotium</i>            | ARSEF 4517          | KM652066                 | KM652109     | KM651992      | KM652032     |              |
| <i>Hirsutella fusiformis</i>                  | ARSEF 5474          | KM652067                 | KM652110     | KM651993      | KM652033     |              |
| <i>Hirsutella guyana</i>                      | ARSEF 878           | KM652068                 | KM652111     | KM651994      | KM652035     |              |
| <i>Hirsutella_haptospora</i>                  | ARSEF 2226          |                          |              | KM651995      | KM652036     |              |
| <i>Hirsutella_liboensis</i>                   | ARSEF 9603          | KM652072                 | KM652115     |               |              |              |
| <i>Hirsutella minnesotensis</i>               | 3608                | JPUM01000376             | JPUM01000376 | JPUM01000211  | JPUM01000139 | JPUM01000138 |
| <i>Hirsutella nodulosa</i>                    | ARSEF 5473          | KM652074                 | KM652117     | KM652000      | KM652040     |              |
| <i>Hirsutella radiata</i>                     | ARSEF 1369          | KM652076                 | KM652119     | KM652002      | KM652042     |              |
| <i>Ophiocordyceps unituberculata</i>          | YHH HU1301          | KY923214                 | KY923212     | KY923216      | KY923218     |              |
| <i>Hirsutella subulata</i>                    | ARSEF 2227          | KM652086                 | KM652130     | KM652013      | KM652051     |              |
| <i>Hymenostilbe odonatae</i>                  | TNS F27117          |                          | KJ878878     |               |              |              |
| <i>Ophiocordyceps_acicularis</i>              | OSC 110988          | EF468951                 | EF468804     | EF468745      | EF468853     |              |
| <i>Ophiocordyceps agriotidis</i>              | ARSEF 5692          | DQ522540                 | DQ518754     | DQ522322      | DQ522368     | DQ522418     |
| <i>Ophiocordyceps albacongiuae</i>            | RC20                | KX713633                 |              | KX713670      |              |              |
| <i>Cordyceps aphodii</i>                      | ARSEF 5498          | DQ522541                 | DQ518755     | DQ522323      |              | DQ522419     |
| <i>Ophiocordyceps appendiculata</i>           | NBRC 106960         | JN941728                 | JN941413     | AB968577      | JN992462     | AB968539     |
| <i>Ophiocordyceps blakebarnesii</i>           | MISSOU3             | KX713643                 | KX713608     | KX713687      | KX713714     |              |
| <i>Cordyceps brunneipunctata</i>              | OSC 128576          | DQ522542                 | DQ518756     | DQ522324      | DQ522369     | DQ522420     |
| <i>Ophiocordyceps camponoti-femorati</i>      | FEMO2               | KX713663                 | KX713590     | KX713678      | KX713702     |              |
| <i>Ophiocordyceps camponoti-floridani</i>     | Flo4                | KX713662                 | KX713591     |               |              |              |
| <i>Ophiocordyceps camponoti-hippocrepidis</i> | HIPPOC              | KX713655                 | KX713597     | KX713673      | KX713707     |              |
| <i>Ophiocordyceps_camponoti-nidulantis</i>    | NIDUL2              | KX713640                 | KX713611     | KX713669      | KX713717     |              |
| <i>Ophiocordyceps_camponoti-renggeri</i>      | ORENG               | KX713634                 | KX713617     | KX713671      |              |              |
| <i>Ophiocordyceps_clavata</i>                 | CEM1762             | KJ878916                 | KJ878882     | KJ878963      | KJ878996     |              |
| <i>Ophiocordyceps cochliidiicola</i>          | HMAS 199612         | KJ878917                 | KJ878884     | KJ878965      | KJ878998     |              |

|                                       |              |          |          |          |          |          |
|---------------------------------------|--------------|----------|----------|----------|----------|----------|
| <i>Ophiocordyceps coenomyia</i>       | NBRC 106964  | AB968385 | AB968413 | AB968571 |          | AB968533 |
| <i>Ophiocordyceps crinalis</i>        | GDGM 17327   | KF226253 | KF226254 | KF226256 | KF226255 |          |
| <i>Ophiocordyceps curculionum</i>     | OSC 151910   | KJ878918 | KJ878885 |          | KJ878999 |          |
| <i>Ophiocordyceps cylindrospora</i>   | MFLU 17-1961 | MG553651 | MG553652 |          |          | MG647029 |
| <i>Ophiocordyceps daceti</i>          | MF01         |          | KX713604 | KX713667 |          |          |
| <i>Ophiocordyceps dipterigena</i>     | OSC 151911   | KJ878919 | KJ878886 | KJ878966 | KJ879000 |          |
| <i>Ophiocordyceps elongata</i>        | OSC 110989   |          | EF468808 | EF468748 | EF468856 |          |
| <i>Ophiocordyceps entomorrhiza</i>    | KEW 53484    | EF468954 | EF468809 | EF468749 | EF468857 | EF468911 |
| <i>Ophiocordyceps formicarum</i>      | TNS F18565   | KJ878921 | KJ878888 | KJ878968 | KJ879002 | KJ878946 |
| <i>Ophiocordyceps formosana</i>       | TNM F13893   | KJ878908 |          | KJ878956 | KJ878988 | KJ878943 |
| <i>Ophiocordyceps forquignonii</i>    | OSC 151902   | KJ878912 | KJ878876 |          | KJ878991 | KJ878945 |
| <i>Ophiocordyceps forquignonii</i>    | OSC 151908   | KJ878922 | KJ878889 |          | KJ879003 | KJ878947 |
| <i>Ophiocordyceps globiceps</i>       | MFLU 18-0661 | MH725812 | MH725830 | MH727388 |          |          |
| <i>Ophiocordyceps gracilis</i>        | EFCC 8572    | EF468956 | EF468811 | EF468751 | EF468859 | EF468912 |
| <i>Ophiocordyceps gracilis</i>        | OSC 151906   | KJ878923 | KJ878890 | KJ878969 |          |          |
| <i>Ophiocordyceps heteropoda</i>      | EFCC 10125   | EF468957 | EF468812 | EF468752 | EF468860 | EF468914 |
| <i>Ophiocordyceps iranginensis</i>    | BCC 82795    |          |          | MH028186 | MH028164 | MH028174 |
| <i>Ophiocordyceps megacuculla</i>     | OSC 128578   | DQ522556 | DQ518770 | DQ522345 | DQ522391 | DQ522445 |
| <i>Ophiocordyceps_granospora</i>      | OSC 128577   | DQ522546 | DQ518760 | DQ522329 | DQ522374 | DQ522427 |
| <i>Ophiocordyceps kimflemingiae</i>   | SC09B        | KX713631 | KX713620 | KX713698 | KX713724 |          |
| <i>Ophiocordyceps kniphofioides</i>   | HUA 186148   | KC610790 | KF658679 | KC610739 | KF658667 | KC610717 |
| <i>Ophiocordyceps konnoana_</i>       | EFCC 7295    | EF468958 |          |          | EF468862 | EF468915 |
| <i>Ophiocordyceps lanpingensis</i>    | YHOS0705     | KC417458 | KC417460 | KC417462 | KC417464 | KC456333 |
| <i>Ophiocordyceps lloydii_</i>        | OSC 151913   | KJ878924 | KJ878891 | KJ878970 | KJ879004 | KJ878948 |
| <i>Ophiocordyceps longissima</i>      | EFCC 6814    |          | EF468817 | EF468757 | EF468865 |          |
| <i>Ophiocordyceps macroacicularis</i> | NBRC 105889  | AB968390 | AB968418 | AB968576 |          | AB968538 |
| <i>Cordyceps melolonthae</i>          | OSC 110993   | DQ522548 | DQ518762 | DQ522331 | DQ522376 |          |
| <i>Ophiocordyceps myrmecophila</i>    | TNS 27120    | KJ878929 | KJ878895 | KJ878975 | KJ879009 |          |
| <i>Ophiocordyceps_khaoyaiensis</i>    | HMAS 199620  | KJ878927 | KJ878893 | KJ878973 | KJ879007 |          |

|                                              |                  |          |                 |                 |                 |                 |
|----------------------------------------------|------------------|----------|-----------------|-----------------|-----------------|-----------------|
| <i>Ophiocordyceps naomipierceae</i>          | DAWKSANT         | KX713664 | KX713589        |                 | KX713701        |                 |
| <i>Ophiocordyceps neovolkiana</i>            | OSC 151903       | KJ878930 | KJ878896        | KJ878976        | KJ879010        |                 |
| <i>Ophiocordyceps nigrella</i>               | EFCC 9247        | EF468963 | EF468818        | EF468758        | EF468866        | EF468920        |
| <i>Ophiocordyceps_oecophyllae</i>            | OECO1            | KX713635 |                 |                 |                 |                 |
| <b><i>Ophiocordyceps pingbianensis</i></b>   | <b>YFCC 8075</b> |          | <b>MT270099</b> | <b>MT270097</b> | <b>MT270098</b> | <b>MT273117</b> |
| <i>Ophiocordyceps pruinosa</i>               | NHJ 12994        | EU369106 | EU369041        | EU369024        | EU369063        | EU369084        |
| <i>Ophiocordyceps pulvinata_</i>             | TNS F 30044      | GU904208 |                 | GU904209        | GU904210        |                 |
| <i>Ophiocordyceps purpureostromata</i>       | TNS F18430       | KJ878931 | KJ878897        | KJ878977        | KJ879011        |                 |
| <i>Ophiocordyceps ramosissimum_</i>          | GZUHHN8          | KJ028012 |                 | KJ028014        | KJ028017        |                 |
| <i>Ophiocordyceps ravenelii</i>              | OSC 151914       | KJ878932 |                 | KJ878978        | KJ879012        | KJ878950        |
| <i>Ophiocordyceps pseudorhizoidea</i>        | NHJ 12522        | EF468970 | EF468825        | EF468764        | EF468873        | EF468923        |
| <i>Ophiocordyceps rubiginosiperitheciata</i> | NBRC 106966      | JN941704 | JN941437        | AB968582        | JN992438        | AB968544        |
| <i>Ophiocordyceps satoi</i>                  | J7               | KX713653 | KX713599        | KX713683        | KX713711        |                 |
| <i>Ophiocordyceps sinensis_</i>              | EFCC 7287        | EF468971 | EF468827        | EF468767        | EF468874        | EF468924        |
| <i>Ophiocordyceps sinensis</i>               | YN07-8           | JX968027 | JX968032        | JX968017        | JX968007        | JX968012        |
| <i>Ophiocordyceps sobolifera</i>             | TNS F18521       | KJ878933 | KJ878898        | KJ878979        | KJ879013        |                 |
| <i>Ophiocordyceps sphecocephala</i>          | OSC 110998       | DQ522551 | DQ518765        | DQ522336        | DQ522381        | DQ522432        |
| <i>Ophiocordyceps sporangifera_</i>          | MFLU 18-0658     |          | EF468817        | EF468757        | EF468865        |                 |
| <i>Ophiocordyceps stylophora</i>             | OSC 110999       | MH725813 | MH725831        | MH727389        | MH727391        |                 |
| <i>Ophiocordyceps superficialis</i>          | MICH 36253       | EF468982 | EF468837        | EF468777        | EF468882        | EF468931        |
| <i>Ophiocordyceps variabilis</i>             | ARSEF 5365       | EF468983 |                 |                 | EF468883        |                 |
| <i>Ophiocordyceps xuefengensis</i>           | GZUH 2012HN14    | KC631789 |                 | KC631793        | KC631798        |                 |
| <i>Ophiocordyceps yakusimensis</i>           | HMAS 199604      | KJ878938 | KJ878902        |                 | KJ879018        | KJ878953        |
| <i>Ophiocordyceps_entomorrhiza</i>           | TNS 16252        | KJ878941 | KJ878906        | KJ878986        |                 |                 |
| <i>Paraisaria myrmicarum</i>                 | IMI 393961       |          | EU797600        | EU797597        |                 |                 |
| <i>Ophiocordyceps_citrina</i>                | TNS F18537       |          | KJ878903        | KJ878983        |                 | KJ878954        |
| <i>Ophiocordyceps_buquetii</i>               | HMAS 199617      | KJ878940 | KJ878905        | KJ878985        | KJ879020        |                 |
| <i>Tolypocladium inflatum</i>                | OSC 71235        | EF469124 | EF469077        | EF469061        | EF469090        | EF469108        |
| <i>Tolypocladium ophioglossoides_</i>        | CBS 100239       | KJ878910 | KJ878874        | KJ878958        | KJ878990        | KJ878944        |

|                                       |             |          |          |          |          |          |
|---------------------------------------|-------------|----------|----------|----------|----------|----------|
| <i>Hirsutella thompsonii</i>          | ARSEF 414   | KM652093 | KM652139 | KM652021 | KM652056 |          |
| <i>Hirsutella thompsonii</i>          | ARSEF 5412  | KM652100 | KM652148 |          |          |          |
| <i>Ophiocordyceps unilateralis_</i>   | VIC 44303   | KX713628 | KX713626 | KX713675 | KX713730 |          |
| <i>Hirsutella satumaensis</i>         | ARSEF 996   | KM652082 | KM652125 | KM652008 | KM652047 |          |
| <i>Ophiocordyceps unituberculata.</i> | YFCC HU1301 | KY923214 | KY923218 | KY923216 |          | KY923220 |
| <i>Ophiocordyceps robertsii</i>       | KEW 27083   |          | EF468826 | EF468766 |          |          |
| <i>Hirsutella illustris</i>           | ARSEF 5539  | KM652069 | KM652112 | KM651996 | KM652037 |          |
| <i>Hirsutella lecaniicola_</i>        | ARSEF 8888  | KM652069 | KM652112 | KM651996 | KM652037 |          |
| <i>Hirsutella rhossiliensis</i>       | ARSEF 2931  | KM652078 | KM652121 | KM652004 | KM652043 |          |
| <i>Hirsutella rhossiliensis</i>       | ARSEF 3747  | KM652080 | KM652123 | KM652006 | KM652045 |          |
| <i>Hirsutella cf. haptospora</i>      | ARSEF 2228  | KM652075 | KM652118 | KM652001 | KM652041 |          |
| <i>Hirsutella strigosa</i>            | ARSEF 2197  | KM652085 | KM652129 | KM652012 | KM652050 |          |
| <i>Ophiocordyceps sinensis</i>        | ARSEF 6282  | KM652083 | KM652126 | HM140637 | HM140640 |          |
