# Supplementary material for: Mitogenomics, Phylogeny and Morphology Reveal Ophiocordyceps pingbianensis Sp. Nov., an Entomopathogenic Fungus from China
Source: MDPI journal article supplement (doi:10.3390/life11070686), 2021-07-14
Supplement: s1 [file s1]

**Table S5.** Codon usage of protein-coding genes in the mitogenome from *Ophiocordyceps pingbianensis*.

| <b>AmAcid</b> | <b>Codon</b> | <b>Frequency</b> | <b>RSCU</b> |
|---------------|--------------|------------------|-------------|
| Leu           | UUA          | 991              | 3.88        |
| Arg           | AGA          | 290              | 3.6         |
| Pro           | CCU          | 223              | 2.37        |
| Ala           | GCU          | 328              | 1.99        |
| Ser           | UCU          | 346              | 1.94        |
| Gly           | GGU          | 324              | 1.93        |
| Val           | GUA          | 294              | 1.91        |
| Thr           | ACU          | 287              | 1.87        |
| Ser           | AGU          | 328              | 1.84        |
| Asp           | GAU          | 405              | 1.75        |
| Tyr           | UAU          | 587              | 1.72        |
| Thr           | ACA          | 262              | 1.71        |
| Ile           | AUA          | 787              | 1.7         |
| Asn           | AAU          | 758              | 1.68        |
| Lys           | AAA          | 890              | 1.68        |
| Phe           | UUU          | 703              | 1.66        |
| His           | CAU          | 218              | 1.62        |
| Gln           | CAA          | 272              | 1.62        |
| Trp           | UGA          | 156              | 1.62        |
| Glu           | GAA          | 395              | 1.61        |
| Val           | GUU          | 234              | 1.52        |
| Cys           | UGU          | 133              | 1.43        |
| Gly           | GGA          | 234              | 1.39        |
| Ala           | GCA          | 211              | 1.28        |
| Ser           | UCA          | 222              | 1.24        |
| Ile           | AUU          | 518              | 1.12        |
| Pro           | CCA          | 98               | 1.04        |
| Met           | AUG          | 269              | 1           |
| Arg           | CGU          | 74               | 0.92        |
| Leu           | CUU          | 197              | 0.77        |
| Leu           | CUA          | 149              | 0.58        |
| Cys           | UGC          | 53               | 0.57        |
| Ser           | AGC          | 96               | 0.54        |
| Leu           | UUG          | 119              | 0.47        |
| Arg           | CGA          | 38               | 0.47        |
| Arg           | AGG          | 38               | 0.47        |
| Ala           | GCC          | 66               | 0.4         |
| Arg           | CGC          | 32               | 0.4         |
| Glu           | GAG          | 96               | 0.39        |
| His           | CAC          | 51               | 0.38        |
| Gln           | CAG          | 64               | 0.38        |
| Trp           | UGG          | 37               | 0.38        |
| Gly           | GGG          | 60               | 0.36        |
| Phe           | UUC          | 145              | 0.34        |
| Val           | GUG          | 52               | 0.34        |
| Ala           | GCG          | 54               | 0.33        |
| Asn           | AAC          | 147              | 0.32        |
| Lys           | AAG          | 168              | 0.32        |
| Gly           | GGC          | 54               | 0.32        |
| Pro           | CCG          | 29               | 0.31        |

---

|     |     |    |      |
|-----|-----|----|------|
| Pro | CCC | 26 | 0.28 |
| Tyr | UAC | 95 | 0.28 |
| Thr | ACG | 39 | 0.25 |
| Asp | GAC | 59 | 0.25 |
| Val | GUC | 35 | 0.23 |
| Ser | UCG | 41 | 0.23 |
| Ser | UCC | 39 | 0.22 |
| Leu | CUG | 49 | 0.19 |
| Ile | AUC | 82 | 0.18 |
| Thr | ACC | 26 | 0.17 |
| Arg | CGG | 12 | 0.15 |
| Leu | CUC | 29 | 0.11 |

---
