# Supplementary material for: Mitogenomics, Phylogeny and Morphology Reveal Ophiocordyceps pingbianensis Sp. Nov., an Entomopathogenic Fungus from China
Source: MDPI journal article supplement (doi:10.3390/life11070686), 2021-07-14
Supplement: s1 [file s1]

**Table S3.** General features in the mitogenome of *Ophiocordyceps pingbianensis*.

| Genomes Features                              | Value      |
|-----------------------------------------------|------------|
| Genomes size (bp)                             | 80,359     |
| G + C content (%)                             | 29.89      |
| Numbers of protein-coding genes               | 15         |
| Total length of the protein-coding genes (bp) | 74081      |
| Numbers of rRNAs                              | 2          |
| Sizes of rns and rnl (bp)                     | 1652, 6444 |
| Numbers of tRNAs                              | 25         |
| Lengths of tRNA genes (bp)                    | 1811       |
| Numbers of ORFs                               | 24         |
| Numbers of introns                            | 27         |
| Intergenic regions (bp)                       | 21697      |
