# Supplementary material for: Mitogenomics, Phylogeny and Morphology Reveal Ophiocordyceps pingbianensis Sp. Nov., an Entomopathogenic Fungus from China
Source: MDPI journal article supplement (doi:10.3390/life11070686), 2021-07-14
Supplement: s1 [file s1]

**Table S4.** Gene component of the mitogenome from *Ophiocordyceps pingbianensis*.

| Gene     | Start Position | Stop Position | Length (bp) | Start Codon | Stop Codon | GC Contents (%) |
|----------|----------------|---------------|-------------|-------------|------------|-----------------|
| trnH-GTG | 445            | 516           | 70          | --          | --         | 37.5            |
| trnM-CAT | 738            | 809           | 70          | --          | --         | 37.5            |
| nad2     | 961            | 6690          | 5728        | ATG         | TAA        | 31.8            |
| orf146   | 6726           | 7166          | 439         | AGA         | TAA        | 28.3            |
| orf132   | 7320           | 7715          | 394         | TGA         | TAA        | 31.3            |
| nad3     | 7997           | 8410          | 412         | ATG         | TAA        | 21.3            |
| atp9     | 8628           | 8852          | 223         | ATG         | TAA        | 32.9            |
| orf293   | 9376           | 10257         | 880         | AGA         | TAG        | 24.3            |
| orf276   | 10652          | 11482         | 829         | ATG         | TAA        | 26.5            |
| cox2     | 9154           | 12319         | 3164        | ATG         | TAA        | 27.3            |
| trnR-ACG | 12812          | 12882         | 69          | --          | --         | 32.4            |
| nad4L    | 13302          | 13571         | 268         | ATG         | TAA        | 24.4            |
| orf306   | 14918          | 15838         | 919         | TTT         | TAG        | 26.4            |
| orf412   | 16154          | 17392         | 1237        | CAA         | TAA        | 25.7            |
| nad5     | 13571          | 18547         | 4975        | ATG         | TAG        | 26.3            |
| orf371   | 19838          | 20953         | 1114        | ATG         | TAA        | 30.2            |
| orf508   | 22541          | 24067         | 1525        | ATG         | TAG        | 21.9            |
| orf310   | 25908          | 26840         | 931         | TAC         | TAA        | 25.7            |
| orf473   | 27376          | 28797         | 1420        | AAA         | TAA        | 24.0            |
| cob      | 25515          | 30126         | 4610        | ATG         | TAA        | 26.7            |
| trnC-GCA | 30273          | 30344         | 70          | --          | --         | 31.9            |
| orf341   | 32340          | 33365         | 1024        | AGA         | TAA        | 24.3            |
| orf394_2 | 33838          | 35022         | 1183        | AAA         | TAA        | 29.3            |
| orf332   | 35279          | 36277         | 997         | AAA         | TAA        | 22.8            |
| cox1     | 31321          | 36717         | 5395        | ATG         | GCT        | 29.0            |
| orf105   | 37420          | 37737         | 316         | ATG         | TAG        | 43.1            |
| orf114   | 37910          | 38254         | 343         | ATG         | TAA        | 38.6            |
| orf623   | 38637          | 40508         | 1870        | ATG         | TAA        | 28.0            |
| orf394   | 40963          | 42147         | 1183        | ATG         | TAA        | 24.0            |
| cox1     | 42215          | 42682         | 466         | CAC         | TAG        | 31.2            |
| trnR-TCT | 43016          | 43086         | 69          | --          | --         | 31.0            |
| nad1     | 43810          | 46106         | 2295        | ATG         | TAA        | 25.8            |
| orf164   | 47506          | 48000         | 493         | AAC         | TAA        | 38.6            |
| orf108   | 48347          | 48673         | 325         | ATG         | TAA        | 38.2            |
| nad4     | 46888          | 50054         | 3165        | ATG         | TAG        | 28.4            |
| orf374   | 50024          | 51148         | 1123        | ATG         | TAG        | 32.4            |
| atp8     | 51985          | 52131         | 145         | ATG         | TAA        | 19.7            |
| orf358   | 52651          | 53727         | 1075        | AAC         | TAG        | 27.9            |
| atp6     | 52309          | 54476         | 2166        | ATG         | TAA        | 27.6            |
| rns      | 55382          | 57035         | 1652        | --          | --         | 33.4            |
| trnY-GTA | 57072          | 57155         | 82          | --          | --         | 38.1            |
| trnD-GTC | 57532          | 57604         | 71          | --          | --         | 37.0            |
| trnS-GCT | 58140          | 58220         | 79          | --          | --         | 37.0            |
| trnN-GTT | 58583          | 58654         | 70          | --          | --         | 36.1            |
| orf302   | 59025          | 59933         | 907         | AAA         | TAG        | 23.5            |
| orf757   | 60749          | 63022         | 2272        | GTG         | TAG        | 35.5            |
| cox3     | 58806          | 63672         | 4865        | ATG         | TAA        | 32.3            |
| trnG-TCC | 64294          | 64364         | 69          | --          | --         | 36.6            |
| nad6     | 64741          | 65541         | 799         | TTG         | TAG        | 25.3            |

|          |       |       |      |     |     |      |
|----------|-------|-------|------|-----|-----|------|
| trnV-TAC | 65747 | 65818 | 70   | --  | --  | 29.2 |
| trnI-GAT | 66572 | 66643 | 70   | --  | --  | 31.9 |
| trnS-TGA | 66970 | 67055 | 84   | --  | --  | 37.2 |
| trnW-TCA | 67168 | 67239 | 70   | --  | --  | 29.2 |
| orf268   | 67623 | 68429 | 805  | ATG | TAA | 24.5 |
| trnP-TGG | 68852 | 68924 | 71   | --  | --  | 50.7 |
| rps3     | 72562 | 74457 | 1894 | ATG | TAG | 24.2 |
| rnl      | 69035 | 75480 | 6444 | --  | --  | 28.8 |
| trnT-TGT | 75484 | 75554 | 69   | --  | --  | 38.0 |
| trnE-TTC | 75964 | 76036 | 71   | --  | --  | 45.2 |
| trnM-CAT | 76040 | 76111 | 70   | --  | --  | 37.5 |
| trnM-CAT | 76113 | 76185 | 71   | --  | --  | 35.6 |
| trnL-TAA | 76224 | 76306 | 81   | --  | --  | 44.6 |
| trnF-GAA | 77347 | 77418 | 70   | --  | --  | 31.9 |
| trnK-TTT | 78065 | 78137 | 71   | --  | --  | 35.6 |
| trnA-TGC | 78744 | 78815 | 70   | --  | --  | 36.1 |
| trnL-TAG | 79115 | 79198 | 82   | --  | --  | 35.7 |
| trnQ-TTG | 79862 | 79935 | 72   | --  | --  | 29.7 |
